# Supplementary material for: MHC diversity confers transgenerational fitness advantage in wild dolphins
Source: Research Square preprint supplement (doi:10.21203/rs.3.rs-7279666/v1), 2025-09-16
Supplement: Supplementary file 1 [file 9a82be65aaa973318eab30dd.pdf]

1 **Supplementary Data File for: MHC genetic diversity confers transgenerational fitness advantage in dolphins**

2 **SUPPLEMENTARY TABLES:**

3 **Supplementary Table 1 | Correlation Matrix**

|                       | MHC<br>Het<br>Sites | Het<br>PBR<br>Sites | Msat<br>Het | Soci-<br>ability | Age at<br>death | Age at<br>last calf | Age last<br>surv.<br>calf | Calving<br>Success | Repro<br>Output<br>1 | Repro<br>Output<br>2 | Offspring<br>Viability<br>1 | Offspring<br>Viability<br>2 |
|-----------------------|---------------------|---------------------|-------------|------------------|-----------------|---------------------|---------------------------|--------------------|----------------------|----------------------|-----------------------------|-----------------------------|
| MHC Het Sites         |                     | 0.9660              | -0.0951     | -0.2325          | 0.1118          | 0.0599              | 0.1331                    | 0.3262             | 0.0155               | -0.1214              | 0.3654                      | 0.3282                      |
| MHC Het PBR Sites     | <0.0001             |                     | -0.0167     | -0.2371          | 0.1170          | 0.0189              | 0.0862                    | 0.3008             | 0.0081               | -0.1001              | 0.3323                      | 0.2967                      |
| Msat Het              | 0.4509              | 0.8951              |             | 0.2678           | -0.0897         | -0.1271             | -0.0134                   | -0.1164            | 0.1626               | 0.0599               | -0.1669                     | -0.1334                     |
| Sociability           | 0.0477              | 0.0434              | 0.0310      |                  | -0.3690         | -0.2189             | -0.2174                   | -0.1854            | 0.1988               | 0.1387               | -0.3869                     | -0.2213                     |
| Age at death          | 0.4255              | 0.4043              | 0.5488      | 0.0065           |                 | 0.8689              | 0.8464                    | 0.2690             | -0.3987              | -0.2242              | 0.4298                      | 0.2909                      |
| Age at last calf      | 0.6198              | 0.8759              | 0.3130      | 0.0666           | <0.0001         |                     | 0.7963                    | 0.3809             | -0.0658              | -0.2740              | 0.4528                      | 0.4057                      |
| Age last surv. calf   | 0.3149              | 0.5165              | 0.9244      | 0.0981           | <0.0001         | <0.0001             |                           | 0.3909             | -0.1695              | -0.3246              | 0.5177                      | 0.4550                      |
| Calving Success       | 0.0049              | 0.0097              | 0.3556      | 0.1164           | 0.0515          | 0.0010              | 0.0022                    |                    | 0.4531               | -0.4795              | 0.8539                      | 0.9444                      |
| Repro Output 1        | 0.8965              | 0.9460              | 0.1956      | 0.0917           | 0.0031          | 0.5858              | 0.1992                    | <0.0001            |                      | -0.1072              | 0.0044                      | 0.3248                      |
| Repro Output 2        | 0.3064              | 0.3992              | 0.6354      | 0.2418           | 0.1065          | 0.0208              | 0.0121                    | <0.0001            | 0.3667               |                      | -0.5861                     | -0.6277                     |
| Offspring Viability 1 | 0.0017              | 0.0046              | 0.1839      | 0.0009           | 0.0015          | <0.0001             | <0.0001                   | <0.0001            | 0.9711               | <0.0001              |                             | 0.8826                      |
| Offspring Viability 2 | 0.0046              | 0.0108              | 0.2894      | 0.0599           | 0.0346          | 0.0050              | <0.0001                   | <0.0001            | 0.0051               | <0.0001              | <0.0001                     |                             |

4 Pearson correlation  $r$  values are shown above the diagonal, and corresponding  $P$ -values shown below the diagonal. MHC Het Sites:  
5 The number of heterozygous sites for the entire MHC sequence for each female. MHC Het PBR Sites = The number of heterozygous  
6 sites for the putative peptide-binding region of the MHC sequences, as defined by previous studies on this region<sup>14,15</sup> for each female.  
7 Msat Het = the number of heterozygous sites per locus across 23 microsatellite loci. Repro Output 1 = observed reproductive output,  
8 based on confirmed sightings of calves. Repro Output 2 = potential maximum reproductive output. Offspring viability 1: observed  
9 offspring viability, based on confirmed sightings of calves. Offspring viability 2: potential minimum estimate. Sociability = the  
10 proportion of sightings of adult female with one or more other adults. Age at death = the estimated age at death of adult female, i.e.  
11 longevity; Age last calf = the estimated age of female when she produced her last offspring; Age at last surv. calf = the estimated age  
12 of female when she produced her last calf that survived to weaning. This is depicted as a correlation matrix heat map in  
13 Supplementary Fig. 1.

**Supplementary Table 2 | Principal component regression (PCR).** Table shows relationships between the predictor variables MHC heterozygosity and age variables versus dependent fitness variables described below. Predictor variables are defined as: (1) ‘Het Sites’ = the number of heterozygous sites of entire MHC II DQB sequence; (2) ‘Het PBR Sites’ = the number of heterozygous sites of parts of the MHC II DQB that code for putative peptide-binding regions (PBR), as defined by previous studies on this region<sup>14,15</sup>; (3) Age at death = the estimated age at death of adult female, i.e. longevity; (4) Age last calf = the estimated age of female when she produced her last offspring. (5) Age surv. calf = the estimated age of female when she produced her last calf that survived to weaning. Dependent variables are: Repro output 1 = observed reproductive output, based on confirmed sightings of calves; Repro output 2 = potential maximum reproductive output; Offspring viability 1 = observed offspring viability, based on confirmed sightings of calves; Offspring viability 2 = potential minimum estimate. Rows that are shaded represent significant positive relationships. The least square estimates of the regression coefficients (‘Estimate’), corresponding 95% confidence interval (asymptotic; 95% CI) and regression *t*-values are tabulated. Analysis of variance summary statistics of the analyses, including sum of squares (SS) for the regression (SS Reg) and total, i.e. combined SS of regression and residuals (SS total), *F* ratios (*F*) and *P*-values are shown below ‘ANOVA’. Goodness of fit results are presented as R-squared ( $R^2$ ), i.e. coefficient of determination, and the standard deviation of the residuals (Sy.x).

| Dep. Var              | Par. Est. | Variable      | Estimate | SE       | 95% CI                  | t      | Pvalue  | Sig. | ANOVA   |          |       |        |                |        | Goodness of Fit |  |
|-----------------------|-----------|---------------|----------|----------|-------------------------|--------|---------|------|---------|----------|-------|--------|----------------|--------|-----------------|--|
|                       |           |               |          |          |                         |        |         |      | SS Reg. | SS Total | F     | Pvalue | R <sup>2</sup> | Sy.x   |                 |  |
| Calving Success       | β0        | Intercept     | 0.05473  | 0.03180  | -0.009544 to 0.1190     | 1.721  | 0.0930  | ns   | 0.0210  | 0.1075   | 4.847 | 0.0130 | 0.1951         | 0.0465 |                 |  |
|                       | β1        | MHC Het       | 0.001181 | 0.000433 | 0.0003059 to 0.002056   | 2.728  | 0.0094  | **   |         |          |       |        |                |        |                 |  |
|                       | β2        | MHC PBR       | 0.001669 | 0.000614 | 0.0004273 to 0.002910   | 2.717  | 0.0097  | **   |         |          |       |        |                |        |                 |  |
|                       | β3        | Age at death  | 0.000393 | 0.000300 | -0.0002129 to 0.0009993 | 1.311  | 0.1973  | ns   |         |          |       |        |                |        |                 |  |
|                       | β4        | Age last calf | 0.000324 | 0.000356 | -0.0003949 to 0.001043  | 0.9114 | 0.3676  | ns   |         |          |       |        |                |        |                 |  |
|                       | B5        | Age sur. calf | 0.000579 | 0.000338 | -0.0001037 to 0.001261  | 1.714  | 0.0943  | ns   |         |          |       |        |                |        |                 |  |
| Repro Output 1        | β0        | Intercept     | 0.2764   | 0.03956  | 0.1965 to 0.3564        | 6.988  | <0.0001 | ***  | 0.0114  | 0.1453   | 1.704 | 0.1950 | 0.0785         | 0.0579 |                 |  |
|                       | β1        | MHC Het       | -0.00011 | 0.000539 | -0.001198 to 0.0009785  | 0.2039 | 0.8394  | ns   |         |          |       |        |                |        |                 |  |
|                       | β2        | MHC PBR       | -0.00015 | 0.000764 | -0.001690 to 0.001399   | 0.1905 | 0.8499  | ns   |         |          |       |        |                |        |                 |  |
|                       | β3        | Age at death  | -0.00068 | 0.000373 | -0.001432 to 7.635e-005 | 1.816  | 0.0768  | ns   |         |          |       |        |                |        |                 |  |
|                       | β4        | Age last calf | -0.00078 | 0.000443 | -0.001671 to 0.0001181  | 1.754  | 0.0871  | ns   |         |          |       |        |                |        |                 |  |
|                       | B5        | Age sur. calf | -0.00078 | 0.000420 | -0.001624 to 7.396e-005 | 1.845  | 0.0724  | ns   |         |          |       |        |                |        |                 |  |
| Repro Output 2        | β0        | Intercept     | 0.3597   | 0.04341  | 0.2719 to 0.4474        | 8.285  | <0.0001 | ***  | 0.0151  | 0.1764   | 1.871 | 0.1672 | 0.0856         | 0.0635 |                 |  |
|                       | β1        | MHC Het       | -0.00023 | 0.000591 | -0.001428 to 0.0009606  | 0.3956 | 0.6945  | ns   |         |          |       |        |                |        |                 |  |
|                       | β2        | MHC PBR       | -0.00032 | 0.000838 | -0.002015 to 0.001374   | 0.3817 | 0.7047  | ns   |         |          |       |        |                |        |                 |  |
|                       | β3        | Age at death  | -0.00076 | 0.000409 | -0.001590 to 6.501e-005 | 1.862  | 0.0699  | ns   |         |          |       |        |                |        |                 |  |
|                       | β4        | Age last calf | -0.00086 | 0.000486 | -0.001843 to 0.0001206  | 1.773  | 0.0839  | ns   |         |          |       |        |                |        |                 |  |
|                       | B5        | Age sur. calf | -0.00088 | 0.000461 | -0.001817 to 4.694e-005 | 1.919  | 0.0621  | ns   |         |          |       |        |                |        |                 |  |
| Offspring Viability 1 | β0        | Intercept     | 0.1510   | 0.1293   | -0.1104 to 0.4124       | 1.167  | 0.2500  | ns   | 0.6837  | 2.116    | 9.549 | 0.0004 | 0.3232         | 0.1892 |                 |  |
|                       | β1        | MHC Het       | 0.005854 | 0.001761 | 0.002295 to 0.009412    | 3.324  | 0.0019  | **   |         |          |       |        |                |        |                 |  |
|                       | β2        | MHC PBR       | 0.008253 | 0.002498 | 0.003204 to 0.01330     | 3.304  | 0.0020  | **   |         |          |       |        |                |        |                 |  |
|                       | β3        | Age at death  | 0.003175 | 0.001220 | 0.0007100 to 0.005641   | 2.603  | 0.0129  | *    |         |          |       |        |                |        |                 |  |
|                       | β4        | Age last calf | 0.003035 | 0.001447 | 0.0001100 to 0.005960   | 2.097  | 0.0424  | *    |         |          |       |        |                |        |                 |  |
|                       | B5        | Age sur. calf | 0.004249 | 0.001374 | 0.001473 to 0.007026    | 3.093  | 0.0036  | **   |         |          |       |        |                |        |                 |  |
| Offspring Viability 2 | β0        | Intercept     | 0.1130   | 0.1465   | -0.1832 to 0.4091       | 0.7710 | 0.4452  | ns   | 0.4358  | 2.273    | 4.744 | 0.0142 | 0.1917         | 0.2143 |                 |  |
|                       | β1        | MHC Het       | 0.004860 | 0.001995 | 0.0008290 to 0.008891   | 2.437  | 0.0194  | *    |         |          |       |        |                |        |                 |  |
|                       | β2        | MHC PBR       | 0.006856 | 0.002830 | 0.001137 to 0.01258     | 2.423  | 0.0200  | *    |         |          |       |        |                |        |                 |  |
|                       | β3        | Age at death  | 0.002368 | 0.001382 | -0.0004248 to 0.005161  | 1.714  | 0.0943  | ns   |         |          |       |        |                |        |                 |  |
|                       | β4        | Age last calf | 0.002207 | 0.001640 | -0.001106 to 0.005521   | 1.346  | 0.1858  | ns   |         |          |       |        |                |        |                 |  |
|                       | B5        | Age sur. calf | 0.003226 | 0.001556 | 8.103e-005 to 0.006371  | 2.073  | 0.0446  | *    |         |          |       |        |                |        |                 |  |

**Supplementary Table 3 | Linear regression analysis for regression plots (Fig. 1a-c, main text).** Association between the number of MHC heterozygous sites of entire sequence (predictor) and fitness measures (calving success, reproductive output and offspring viability).

| Predictor: MHC Heterozygous Sites  |          |                     |                       |          |          |                   |
|------------------------------------|----------|---------------------|-----------------------|----------|----------|-------------------|
| Fitness                            | <i>n</i> | Slope (SE)          | <i>R</i> <sup>2</sup> | <i>F</i> | <i>p</i> | sig. <sup>c</sup> |
| Calving success                    | 73       | 0.2869<br>(0.09868) | 0.1064                | 8.46     | 0.0049   | **                |
| Repro Output 1 <sup>a</sup>        | 73       | 0.01565<br>(0.1199) | 0.00024               | 0.017    | 0.8965   | ns                |
| Repro Output 2 <sup>a</sup>        | 73       | -0.1261<br>(0.1224) | 0.01473               | 1.064    | 0.3064   | ns                |
| Offspring viability 1 <sup>b</sup> | 71       | 1.458<br>(0.4471)   | 0.1335                | 10.63    | 0.0017   | **                |
| Offspring viability 2 <sup>b</sup> | 73       | 1.156<br>(0.3950)   | 0.1077                | 8.57     | 0.0046   | **                |

<sup>a</sup>Repro Output 1 = observed reproductive output, based on confirmed sightings of calves; Repro Output 2 = potential maximum reproductive output. <sup>b</sup>Offspring viability 1 = observed offspring viability, based on confirmed sightings of calves. <sup>b</sup>Offspring viability 2 = potential minimum estimate of offspring viability. <sup>c</sup>sig. = statistical significance testing whether slope is significantly non-zero, based on linear regression: ns = not significant ( $P \geq 0.05$ ), \* $P < 0.05$ ; \*\* $P < 0.01$ .

**Supplementary Table 4 | Two-tailed Mann-Whitney *U* tests: Comparing fitness measures for MHC heterozygous vs homozygous adult females**

| <b>Mann-Whitney <i>U</i>: All Sites</b> |                         |                         |                                  |                                  |                              |                 |                         |
|-----------------------------------------|-------------------------|-------------------------|----------------------------------|----------------------------------|------------------------------|-----------------|-------------------------|
| <b>FITNESS</b>                          | <b>Het.<sup>c</sup></b> | <b>Hom.<sup>c</sup></b> | <b><i>n</i> Het.<sup>d</sup></b> | <b><i>n</i> Hom.<sup>d</sup></b> | <b><i>Mann-Whitney U</i></b> | <b><i>P</i></b> | <b>sig.<sup>e</sup></b> |
| Calving success                         | 0.1109<br>(0.008450)    | 0.06335<br>(0.01938)    | 66                               | 7                                | 130.0                        | 0.0571          | ns                      |
| Repro output 1 <sup>a</sup>             | 0.1942<br>(0.009687)    | 0.2174<br>(0.03815)     | 66                               | 7                                | 177.5                        | 0.3254          | ns                      |
| Repro output 2 <sup>a</sup>             | 0.3017<br>(0.02986)     | 0.3179<br>(0.02986)     | 66                               | 7                                | 191.5                        | 0.4699          | ns                      |
| Offspring viability 1 <sup>b</sup>      | 0.5694<br>(0.03814)     | 0.2738<br>(0.07867)     | 64                               | 7                                | 90.5                         | 0.0076          | **                      |
| Offspring viability 2 <sup>b</sup>      | 0.4153<br>(0.03371)     | 0.2190<br>(0.06730)     | 66                               | 7                                | 125                          | 0.0451          | *                       |

<sup>a</sup>Repro Output 1 = observed reproductive output, based on confirmed sightings of calves; Repro Output 2 = potential maximum reproductive output. <sup>b</sup>Offspring viability 1 = observed offspring viability, based on confirmed sightings of calves. <sup>b</sup>Offspring viability 2 = potential minimum estimate of offspring viability. <sup>c</sup>mean fitness estimates for adult females that were heterozygous ('Het.') and homozygous ('Hom') for the MHC region. Standard errors are shown in brackets. <sup>d</sup>sample sizes for adult females that were heterozygous ('Het.') and homozygous ('Hom') for the MHC region. Standard errors are shown in brackets. <sup>e</sup>sig. = statistical significance testing for Mann-Whitney *U* test: ns = not significant ( $P \geq 0.05$ ), \* $P < 0.05$ ; \*\* $P < 0.01$ . Results for Mann-Whitney *U* tests, based on heterozygotes versus homozygotes for the peptide-binding region (PBR) of the MHC sequences are tabulated in Supplementary Table 5.

**Supplementary Table 5 | Two-tailed Mann-Whitney *U* tests: Comparing fitness measures for MHC heterozygous vs homozygous adult females, based on peptide-binding region (PBR)**

| Mann-Whitney <i>U</i> : PBR Sites  |                      |                      |                            |                            |                       |          |
|------------------------------------|----------------------|----------------------|----------------------------|----------------------------|-----------------------|----------|
| FITNESS                            | Het. <sup>c</sup>    | Hom. <sup>c</sup>    | <i>n</i> Het. <sup>d</sup> | <i>n</i> Hom. <sup>d</sup> | Mann-Whitney <i>U</i> | <i>P</i> |
| Calving success                    | 0.1128<br>(0.008535) | 0.06003<br>(0.01700) | 64                         | 9                          | 153                   | 0.0214   |
| Repro output 1 <sup>a</sup>        | 0.1941<br>(0.009954) | 0.2127<br>(0.02988)  | 64                         | 9                          | 237                   | 0.4003   |
| Repro output 2 <sup>a</sup>        | 0.3028<br>(0.01011)  | 0.3065<br>(0.02496)  | 64                         | 9                          | 262                   | 0.6705   |
| Offspring viability 1 <sup>b</sup> | 0.5780<br>(0.03828)  | 0.2796<br>(0.07826)  | 62                         | 9                          | 118.5                 | 0.0040   |
| Offspring viability 2 <sup>b</sup> | 0.4214<br>(0.03414)  | 0.2180<br>(0.06260)  | 64                         | 9                          | 155.5                 | 0.0239   |

<sup>a</sup>Repro Output 1 = observed reproductive output, based on confirmed sightings of calves; Repro Output 2 = potential maximum reproductive output. <sup>b</sup>Offspring viability 1 = observed offspring viability, based on confirmed sightings of calves. <sup>b</sup>Offspring viability 2 = potential minimum estimate of offspring viability. <sup>c</sup>mean fitness estimates for adult females that were heterozygous ('Het.') and homozygous ('Hom') for the MHC region. Standard errors are shown in brackets. <sup>d</sup>sample sizes for adult females that were heterozygous ('Het.') and homozygous ('Hom') for the peptide-binding region (PBR)<sup>14,15</sup> of the MHC sequence. Standard errors are shown in brackets. <sup>e</sup>sig. = statistical significance testing for Mann-Whitney *U* test: ns = not significant ( $P \geq 0.05$ ),  $*P < 0.05$ ;  $**P < 0.01$ . Results of Mann-Whitney *U* tests, based on heterozygotes versus homozygotes for the entire MHC sequences are tabulated in Supplementary Table 4.

**Supplementary Table 6 | Two-tailed Mann-Whitney *U* tests: Comparing MHC  $F_{IS}$  for high vs low fitness measures**

| Fitness Measure <sup>a</sup> |      | $n^b$ | $F_{IS}^c$     | $U$  | $P$    | sig |
|------------------------------|------|-------|----------------|------|--------|-----|
| Calving Success              | High | 36    | -0.120 (0.034) | 1437 | 0.0438 | *   |
|                              | Low  | 36    | 0.057 (0.037)  |      |        |     |
| Repro Output 1               | High | 36    | -0.030 (0.038) | 1972 | 0.5208 | ns  |
|                              | Low  | 36    | -0.071 (0.030) |      |        |     |
| Repro Output 2               | High | 36    | -0.024 (0.033) | 1988 | 0.4632 | ns  |
|                              | Low  | 36    | -0.088 (0.031) |      |        |     |
| Offspring Viability 1        | High | 35    | -0.155 (0.039) | 1421 | 0.0074 | **  |
|                              | Low  | 35    | 0.029 (0.031)  |      |        |     |
| Offspring Viability 2        | High | 36    | -0.103 (0.037) | 1448 | 0.0402 | *   |
|                              | Low  | 36    | 0.042 (0.035)  |      |        |     |

<sup>a</sup>Repro Output 1 = observed reproductive output, based on confirmed sightings of calves; Repro Output 2 = potential maximum reproductive output. <sup>b</sup>Offspring viability 1 = observed offspring viability, based on confirmed sightings of calves. <sup>b</sup>Offspring viability 2 = potential minimum estimate of offspring viability. 'High' = subset of sample with fitness values above the median; 'Low' = subset of sample with fitness values below the median. <sup>b</sup> $n$  = the number of adult females/sequences in the sample. <sup>c</sup> $F_{IS}$  = inbreeding coefficient (standard error in brackets) for the MHC locus. sig. = statistical significance comparing diversity measures for 'high' vs 'low', based on Mann-Whitney *U* tests: ns = not significant ( $P \geq 0.05$ ), \* $P < 0.05$ ; \*\* $P < 0.01$ .

**Supplementary Table 7 | Two-tailed Mann-Whitney  $U$  tests: Comparing microsatellite  $F_{IS}$  for high vs low fitness measures**

| Fitness Measure <sup>a</sup> |      | $n^b$ | $F_{IS}^c$     | $U$   | $P$    | sig |
|------------------------------|------|-------|----------------|-------|--------|-----|
| Calving Success              | High | 32    | 0.0076 (0.032) | 263.5 | 0.9871 | ns  |
|                              | Low  | 32    | 0.0193 (0.035) |       |        |     |
| Repro Output 1               | High | 32    | 0.0010 (0.024) | 227   | 0.4167 | ns  |
|                              | Low  | 32    | 0.0391 (0.032) |       |        |     |
| Repro Output 2               | High | 32    | 0.030 (0.023)  | 240   | 0.5975 | ns  |
|                              | Low  | 32    | 0.011 (0.034)  |       |        |     |
| Offspring Viability 1        | High | 32    | 0.034 (0.033)  | 233.5 | 0.5031 | ns  |
|                              | Low  | 32    | 0.014 (0.032)  |       |        |     |
| Offspring Viability 2        | High | 32    | 0.038 (0.035)  | 235   | 0.5241 | ns  |
|                              | Low  | 32    | 0.010 (0.036)  |       |        |     |

<sup>a</sup>Repro output 1 = observed reproductive output, based on confirmed sightings of calves; Repro output 2 = potential maximum reproductive output. <sup>b</sup>Offspring viability 1 = observed offspring viability, based on confirmed sightings of calves. <sup>b</sup>Offspring viability 2 = potential minimum estimate of offspring viability. 'High' = subset of sample with fitness values above the median; 'Low' = subset of sample with fitness values below the median. <sup>b</sup> $n$  = the number of adult females/sequences in the sample. <sup>c</sup> $F_{IS}$  = inbreeding coefficient (standard error in brackets) across 23 polymorphic microsatellite loci. sig. = statistical significance comparing diversity measures for 'high' vs 'low', based on Mann-Whitney  $U$  tests: ns = not significant ( $P \geq 0.05$ ).



## SUPPLEMENTARY FIGURES:

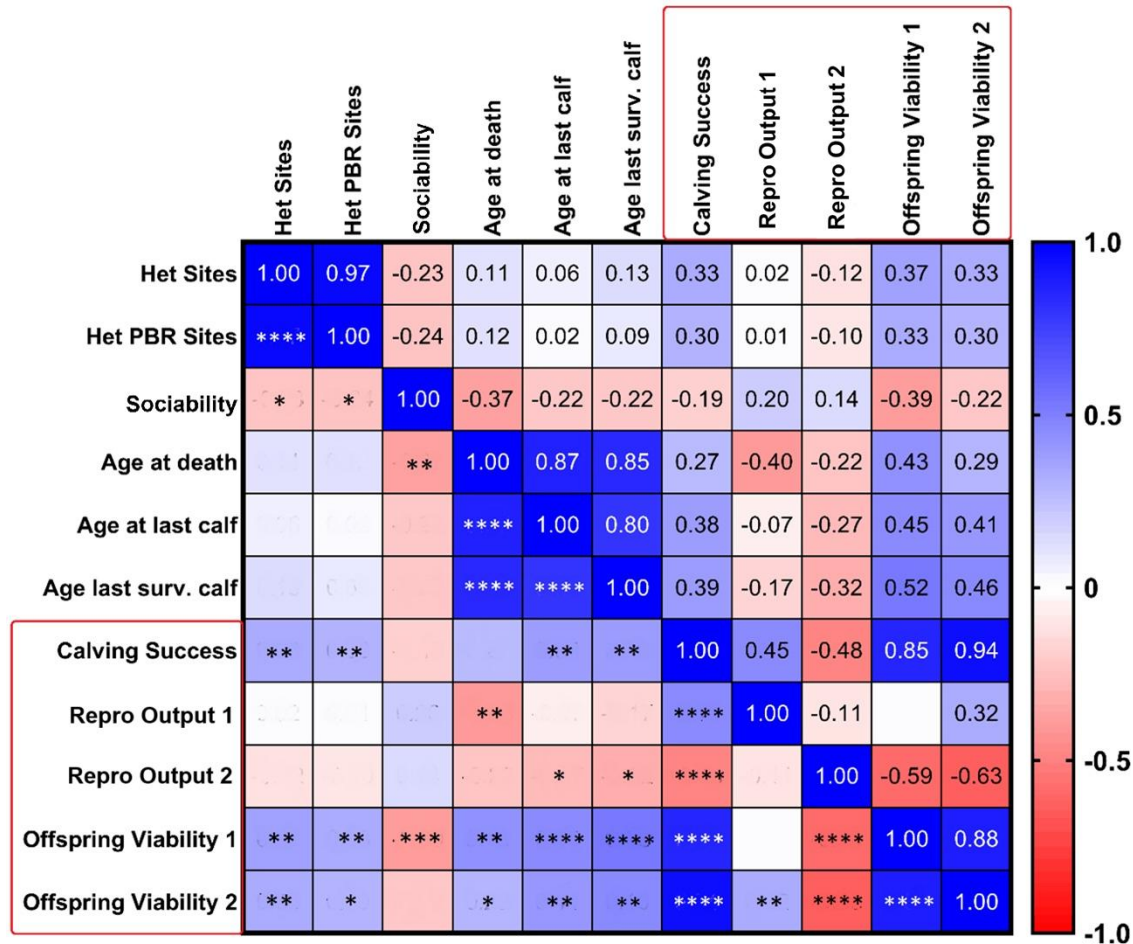

**Supplementary Fig. 1 | Correlation matrix heat map.** Pearson correlation  $r$  values for significant correlations are shown above the diagonal, and corresponding significance, based on  $P$ -values shown as asterisks below the diagonal: \* $P < 0.05$ ; \*\* $P < 0.01$ , \*\*\* $P < 0.001$ , \*\*\*\* $P < 0.0001$ . Corresponding  $P$ -values are shown in Supplementary Table 1. Het Sites = The number of heterozygous sites for the entire MHC sequence for each female. Het PBR Sites = The number of heterozygous sites for the putative peptide-binding region of the MHC sequences, as defined by previous studies on this region<sup>14, 15</sup> for each female. Sociability = the proportion of sightings of adult female with one or more other adults. Age at death = the estimated age at death of adult female, i.e. longevity; Age last calf = the estimated age of female when she produced her last offspring; Age at last surv. calf = the estimated age of female when she produced her last calf that survived to weaning. Fitness measures are highlighted in red box: Repro Output 1 = observed reproductive output, based on confirmed sightings of calves. Repro Output 2 = potential maximum reproductive output. Offspring viability 1 = observed offspring viability, based on confirmed sightings of calves. Offspring viability 2 = potential minimum estimate of offspring viability.

**a MHC PBR Homozygous MHC PBR Heterozygous**

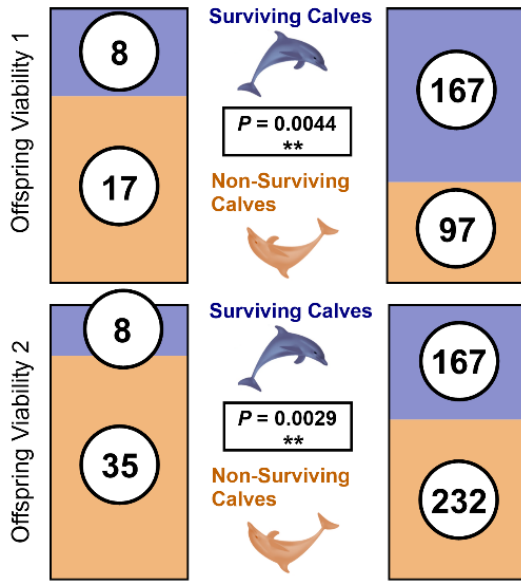

**Supplementary Fig. 2 | Bar graphs & two-tailed Fisher's exact test results (MHC-PBR).**

Comparison between the number of surviving and non-surviving calves collectively produced by adult females that were homozygous or heterozygous for the MHC peptide-binding region (PBR). Stacked bar graphs show the relative percentages of surviving (blue) and non-surviving calves (orange) cumulatively produced by adult females who were homozygous or heterozygous for the entire MHC region. The numbers of surviving and non-surviving calves are shown in white font and black shading; percentages of surviving and non-surviving calves are shown in parentheses (black font). Fisher's exact test  $P$ -values are shown for each comparison in boxes between stacked bar graphs:  $**P < 0.01$ . **a**, estimates for non-surviving calves based on confirmed sightings of calves (offspring viability 1); **b**, estimates for non-surviving calves, based on potential minimum estimate for offspring viability (offspring viability 2). Results for the entire MHC II DQB region are shown in Fig. 2 of main text.

195   **References:**

- 196   14. Heimeier, D., Baker, C.S., Russell, K., Duignan, P. J., Hutt, A., & Stone, G.S. Confirmed  
197   expression of MHC class I and class II genes in the New Zealand endemic Hector's dolphin  
198   (*Cephalorhynchus hectori*). *Mar. Mammal Sci.* **25**, 68–90 (2009).  
199  
200   15. Manlik, O., Krützen, M., Kopps, A.M., Mann, J., Bejder, L., Allen, S.J., Frère, C., Connor,  
201   R.C. & Sherwin, WB. Is MHC diversity a better marker for conservation than neutral genetic  
202   diversity? A case study of two contrasting dolphin populations. *Ecol. Evol.* **9**, 6986-6998  
203   (2019a).  
204
